# Supplementary material
Source: MDPI journal article supplement (https://www.mdpi.com/2673-4672/1/4/16)
Supplement: s1 [file s1]

Supplementary material for

## **Bisphenol A: quantification in complex matrices and removal by anaerobic sludges**

Justus Hardegen <sup>1,2</sup>, Patrick Bräutigam <sup>3</sup>, Christian Abendroth <sup>1,4,\*</sup> and Thomas Wichard <sup>2,\*</sup>

1 Robert Boyle Institute e.V., Jena, Germany

2 Institute for Inorganic and Analytical Chemistry, Friedrich Schiller University Jena, Germany

3 Center for Energy and Environment, Friedrich Schiller University Jena, Germany

4 Institute of Waste Management and Circular Economy, Technische Universität Dresden, Germany

\* Correspondence: [abendroth.ca@gmail.com](mailto:abendroth.ca@gmail.com), [thomas.wichard@uni-jena.de](mailto:thomas.wichard@uni-jena.de)

**Table S1 Seeding sludges and plant parameters.** DSS, Digested sewage sludge; CoD, Co-digester; OLR, Organic loading rate; VS, Volatile solids; HRT, Hydraulic retention time; understudied; T, Temperature; CSTR, Continuous Stirred-Tank Reactor.

| Inoculum                         |      | Dry mass | OLR                                      | HRT       | Feed                                                                                           | T  | System                                      |
|----------------------------------|------|----------|------------------------------------------|-----------|------------------------------------------------------------------------------------------------|----|---------------------------------------------|
|                                  |      | %        | kg VS<br>m <sup>-3</sup> d <sup>-1</sup> | d         |                                                                                                | °C |                                             |
| <b>Digested<br/>sludge</b>       | DSS1 | 2.7      | 1.80                                     | 30        | Municipal<br>sewage sludge<br>from CAS<br>treatment.<br>Wastewater<br>partially<br>industrial. | 37 | CSTR                                        |
| <b>Digested<br/>sludge</b>       | DSS2 | 3.4      | 0.96                                     | 29        |                                                                                                | 37 | CSTR                                        |
| <b>Digested<br/>sludge</b>       | DSS3 | 3.4      | 1.67                                     | 19        |                                                                                                | 37 | CSTR                                        |
| <b>Co-digester<br/>sludge</b>    | CoD1 | 11.7     | 3.00                                     | 87        | Silage, farm<br>manure, and<br>farming waste                                                   | 37 | CSTR                                        |
| <b>Co-digester<br/>digestate</b> | CoD2 | 3.8      | 1.00                                     | 20-<br>30 | Food wastes.<br>Partially<br>packaged                                                          | 42 | Autonomous<br>hydraulically<br>mixed system |
| <b>Co-digester<br/>leachate</b>  | CoD3 | 3.5      | 0.90                                     | 33        | Organic fraction<br>of municipal<br>solid waste                                                | 37 | Dry<br>fermentation                         |
